# Supplementary material for: The Genome of the Yellow Mealworm, Tenebrio molitor: It’s Bigger Than You Think
Source: MDPI journal article supplement (doi:10.3390/genes14122209), 2023-12-14
Supplement: s1 [file s1]

Table S1. Metrics of transcripts from lifestages/sexes of *T. molitor*.

| Lifestage                       | Abbreviation | Biological replicates | Total Reads/lifestage |
|---------------------------------|--------------|-----------------------|-----------------------|
| Eggs                            | eggs         | 4                     | 21,988,095            |
| early larvae(<1mo)              | el           | 4                     | 19,963,350            |
| middle larvae (1 to 2 mo)       | ml           | 4                     | 26,316,029            |
| large larvae (2 mo to prepupae) | ll           | 4                     | 26,089,271            |
| early female pupae              | efp          | 4                     | 29,764,923            |
| early male pupae                | emp          | 4                     | 26,854,148            |
| late female pupae               | lfp          | 4                     | 25,910,537            |
| late male pupae                 | lmp          | 2                     | 6,690,083             |
| early female adult              | efa          | 4                     | 23,910,370            |
| early male adult                | ema          | 4                     | 23,748,255            |
| late female adult               | lfa          | 4                     | 26,658,438            |
| late male adult                 | lma          | 3                     | 21,158,006            |
| TOTAL                           |              | 45                    | 279,051,505           |
