# Supplementary material for: The Genome of the Yellow Mealworm, Tenebrio molitor: It’s Bigger Than You Think
Source: MDPI journal article supplement (doi:10.3390/genes14122209), 2023-12-14
Supplement: s1 [file s1]

**Table S5. *T. molitor* embryo microinjections, hatch rate, and transient expression rate.** Injections with sgRNA # 1, 2, or 3, and 1/2/3 are detailed in methods; two groups were injected without sgRNAs as controls.

| sgRNA   | sgRNA<br>(pmol/mL) | #eggs | Hatched | Hatch rate<br>(%) | G <sub>0</sub> transient<br>expression rate (%) |
|---------|--------------------|-------|---------|-------------------|-------------------------------------------------|
| # 1/2/3 | 18                 | 480   | 182     | 38                | 13                                              |
| # 1     | 6                  | 508   | 290     | 57                | 58                                              |
| # 2     | 6                  | 509   | 264     | 52                | 69                                              |
| # 3     | 6                  | 537   | 251     | 47                | 50                                              |
| none    | N/A                | 185   | 91      | 49                | 27                                              |
| none    | N/A                | 540   | 194     | 36                | 51                                              |
