# Supplementary material for: The Genome of the Yellow Mealworm, Tenebrio molitor: It’s Bigger Than You Think
Source: MDPI journal article supplement (doi:10.3390/genes14122209), 2023-12-14
Supplement: s1 [file s1]

**Table S6. Results of the *T. molitor* self-crossed knock-out phenotype screen.**

| <b>sgRNA</b> | <b># Knock-out self-crosses</b> | <b># of white eye in G<sub>1</sub></b> | <b># of G<sub>1</sub> self-crosses</b> | <b># of white eye in G<sub>2</sub></b> | <b>Knock-out Rate (%)</b> |
|--------------|---------------------------------|----------------------------------------|----------------------------------------|----------------------------------------|---------------------------|
| # 1, 2, 3    | 4                               | 2                                      | 9                                      | 5                                      | 54                        |
| # 1          | 7                               | 2                                      | 12                                     | 7                                      | 47                        |
| # 2          | 11                              | 0                                      | 9                                      | 6                                      | 30                        |
| # 3          | 3                               | 0                                      | 6                                      | 4                                      | 44                        |
| none         | 1                               | 0                                      | 1                                      | 0                                      | 0                         |
