# Supplementary material for: The Genome of the Yellow Mealworm, Tenebrio molitor: It’s Bigger Than You Think
Source: MDPI journal article supplement (doi:10.3390/genes14122209), 2023-12-14
Supplement: s1 [file s1]

**Table S7. Results of the *T. molitor* G<sub>1</sub> EGFP knock-in phenotype screen.** In the injections with either sgRNA # 1, 2, 3, or 1/2/3, or no sgRNA, the parameters are provided for the number of individuals in the G<sub>1</sub> knock-in out-crosses and number of crosses with EGFP for G<sub>2</sub>, and the number of individuals in the knock-out self-crosses, and # of crosses with EGFP for G<sub>2</sub>.

| sgRNA   | # of knock-in out-crosses | # of crosses w/ E+ G <sub>1</sub> | # of knock-out self-crosses | # of crosses w/ E+ G <sub>1</sub> | Knock-in rate (%) |
|---------|---------------------------|-----------------------------------|-----------------------------|-----------------------------------|-------------------|
| 3 sgRNA | 9                         | 0                                 | 4                           | 0                                 | 0                 |
| sgRNA#1 | 12                        | 2                                 | 7                           | 0                                 | 10                |
| sgRNA#2 | 9                         | 6                                 | 11                          | 0                                 | 30                |
| sgRNA#3 | 6                         | 2                                 | 3                           | 0                                 | 22                |
| none    | 1                         | 0                                 | 0                           | 0                                 | 0                 |
