# Supplementary material for: The Genome of the Yellow Mealworm, Tenebrio molitor: It’s Bigger Than You Think
Source: MDPI journal article supplement (doi:10.3390/genes14122209), 2023-12-14
Supplement: s1 [file s1]

**Table S4. Statistics on the number of genes expressed >1,000 RPKM in the different *T. molitor* lifestages or sexes.**

| Developmental stage | Number of genes (>1000 RPKM) | Gene with highest expression | Description                                    | RPKM        |
|---------------------|------------------------------|------------------------------|------------------------------------------------|-------------|
| eggs                | 100                          | g38548.t1*                   | hypothetical protein TcasGA2_TC034988, partial | 132,696.576 |
| el                  | 99                           | g22275.t1                    | no annotation                                  | 245,327.223 |
| ml                  | 115                          | g22275.t1                    | no annotation                                  | 138,457.527 |
| ll                  | 104                          | g38548.t1                    | hypothetical protein TcasGA2_TC034988, partial | 118,368.951 |
| emp                 | 89                           | g39335.t1                    | no annotation                                  | 133,624.082 |
| lmp                 | 105                          | g20218.t1                    | no annotation                                  | 114,715.827 |
| ema                 | 122                          | g38548.t1                    | hypothetical protein TcasGA2_TC034988, partial | 152,189.755 |
| lma                 | 137                          | g22275.t1                    | no annotation                                  | 155,107.997 |
| efp                 | 146                          | g38548.t1                    | hypothetical protein TcasGA2_TC034988, partial | 165,600.659 |
| lfp                 | 145                          | g22275.t1                    | no annotation                                  | 164,052.483 |
| efa                 | 97                           | g38548.t1                    | hypothetical protein TcasGA2_TC034988, partial | 93,422.419  |
| lfa                 | 124                          | g22275.t1                    | no annotation                                  | 209,018.561 |

- Amino acid sequence: MVGSGLPCCNGLTGNQGSIPEREPEKRLPHSRKAAGAQTISRHGEVVTKNNDTGLIRGPVIGMSTL
