# Supplementary material for: The Genome of the Yellow Mealworm, Tenebrio molitor: It’s Bigger Than You Think
Source: MDPI journal article supplement (doi:10.3390/genes14122209), 2023-12-14
Supplement: s1 [file s1]

Table S3. Results of NCBI GenBank database searches with 11 satDNAs of *T. molitor*.

|                            | WGS insecta (4235 databases)    |             |                 |              | NCBI insecta nucleotide collection |             |                 |              |
|----------------------------|---------------------------------|-------------|-----------------|--------------|------------------------------------|-------------|-----------------|--------------|
| satDNA                     | Species                         | Order       | Query cover (%) | Identity (%) | Species                            | Order       | Query cover (%) | Identity (%) |
| <b>TmSat1<br/>(142 bp)</b> | <i>Solenopsis invicta</i>       | Hymenoptera | 100             | 100          | <i>Tenebrio obscurus</i>           | Coleoptera  | 99              | 78.3         |
|                            | <i>Periplaneta americana</i>    | Blattodea   | 100             | 98.6         |                                    |             |                 |              |
|                            | <i>Zophobas morio</i>           | Coleoptera  | 100             | 100          |                                    |             |                 |              |
| <b>TmSat2<br/>(180 bp)</b> |                                 |             |                 |              | <i>Camptogramma bilineata</i>      | Lepidoptera | 21              | 89.7         |
| <b>TmSat3<br/>(325 bp)</b> | <i>Phosphuga atrata</i>         | Coleoptera  | 28              | 77.6         | <i>Phosphuga atrata</i>            | Coleoptera  | 29              | 78.7         |
|                            | <i>Drosophila melanica</i>      | Diptera     | 11              | 97.3         | <i>Aelia acuminata</i>             | Hemiptera   | 12              | 90.0         |
|                            | <i>Drosophila micromelanica</i> | Diptera     | 10              | 100          | <i>Bellardia bayeri</i>            | Diptera     | 18              | 85.4         |
| <b>TmSat4<br/>(245 bp)</b> | <i>Podabrus alpinus</i>         | Coleoptera  | 36              | 76.6         | <i>Podabrus alpinus</i>            | Coleoptera  | 64              | 75.5         |
|                            | <i>Hydrotaea cyrtoneurina</i>   | Diptera     | 24              | 91           | <i>Cantharis rustica</i>           | Coleoptera  | 25              | 90.0         |
|                            |                                 |             |                 |              | <i>Cantharis nigra</i>             | Coleoptera  | 17              | 88.1         |
|                            |                                 |             |                 |              | <i>Cantharis rufa</i>              | Coleoptera  | 17              | 88.1         |
|                            |                                 |             |                 |              | <i>Bemisia tabaci</i>              | Hemiptera   | 15              | 89.5         |
|                            |                                 |             |                 |              | <i>Rhagonycha fulva</i>            | Coleoptera  | 17              | 88.1         |
|                            |                                 |             |                 |              | <i>Hydrotaea cyrtoneurina</i>      | Diptera     | 25              | 88.0         |
|                            |                                 |             |                 |              | <i>Salpingus planirostris</i>      | Coleoptera  | 11              | 100          |
|                            |                                 |             |                 |              | <i>Agonum fuliginosum</i>          | Coleoptera  | 24              | 80.3         |
| <b>TmSat5<br/>(364 bp)</b> | <i>Neruda aoede</i>             | Lepidoptera | 17              | 83.1         | <i>Miltochrista miniata</i>        | Lepidoptera | 11              | 88.4         |
|                            |                                 |             |                 |              | <i>Yponomeuta plumbellus</i>       | Lepidoptera | 10              | 89.5         |
| <b>TmSat6<br/>(227 bp)</b> | <i>Periplaneta americana</i>    | Blattodea   | 95              | 93.5         | <i>Melinaea menophilus</i>         | Lepidoptera | 17              | 92.7         |
|                            |                                 |             |                 |              | <i>Synanthedon formicaeformis</i>  | Lepidoptera | 22              | 82.7         |
|                            |                                 |             |                 |              | <i>Chloroclysta siterata</i>       | Lepidoptera | 19              | 84.4         |
|                            |                                 |             |                 |              | <i>Melinaea marsaeus rileyi</i>    | Lepidoptera | 16              | 89.7         |
| <b>TmSat7<br/>(189 bp)</b> | <i>Dinoponera quadriceps</i>    | Hymenoptera | 100             | 100          |                                    |             |                 |              |
|                            | <i>Periplaneta americana</i>    | Blattodea   | 88              | 97.1         |                                    |             |                 |              |

|                             |                            |            |    |      |                              |             |    |      |
|-----------------------------|----------------------------|------------|----|------|------------------------------|-------------|----|------|
| <b>TmSat8<br/>(735 bp)</b>  | <i>Zophobas atratus</i>    | Coleoptera | 18 | 82.3 | <i>Dilophus febrilis</i>     | Diptera     | 14 | 74.1 |
|                             | <i>Tribolium madens</i>    | Coleoptera | 16 | 75.6 | <i>Cantharis rustica</i>     | Coleoptera  | 13 | 73.7 |
|                             | <i>Tribolium freemani</i>  | Coleoptera | 13 | 73.9 | <i>Acrobasis suavella</i>    | Lepidoptera | 12 | 74.2 |
|                             | <i>Latheticus oryzae</i>   | Coleoptera |    |      |                              |             |    |      |
| <b>TmSat9<br/>(108 bp)</b>  |                            |            |    |      |                              |             |    |      |
| <b>TmSat10<br/>(150 bp)</b> | <i>Zophobas atratus</i>    | Coleoptera | 56 | 85.7 | <i>Tribolium freemani</i>    | Coleoptera  | 54 | 76.8 |
|                             | <i>Tribolium confusum</i>  | Coleoptera | 78 | 73.7 | <i>Vespula vulgaris</i>      | Hymenoptera | 30 | 86.7 |
|                             | <i>Tribolium freemani</i>  | Coleoptera | 54 | 76.8 | <i>Vespula germanica</i>     | Hymenoptera | 30 | 86.7 |
|                             | <i>Tribolium castaneum</i> | Coleoptera | 54 | 76.8 | <i>Perizoma affinitatum</i>  | Lepidoptera | 25 | 89.4 |
|                             | <i>Latheticus oryzae</i>   | Coleoptera | 52 | 79.5 | <i>Thymelicus sylvestris</i> | Lepidoptera | 30 | 87.0 |
|                             | <i>Cynaesus angustus</i>   | Coleoptera | 48 | 78.0 | <i>Myopa testacea</i>        | Diptera     | 35 | 83.0 |
|                             |                            |            |    |      | <i>Ligdia adustata</i>       | Lepidoptera | 25 | 89.5 |
| <b>TmSat11<br/>(93 bp)</b>  |                            |            |    |      |                              |             |    |      |
