# Supplementary material for: The Genome of the Yellow Mealworm, Tenebrio molitor: It’s Bigger Than You Think
Source: MDPI journal article supplement (doi:10.3390/genes14122209), 2023-12-14
Supplement: s1 [file s1]

**Table S2. Three sgRNAs selected from the *Tm vermilion* gene for use in CRISPR/Cas9 injections.**

| sgRNA | Sequence + PAM          |
|-------|-------------------------|
| # 1   | GAACAACTGGGTGAAGAAGATGG |
| # 2   | GGGCAAGATAGTGAACAACTGGG |
| # 3   | ACTTACGAGGTTCTTCTAACAGG |
