# Supplementary figures and images for: The Genome of the Yellow Mealworm, Tenebrio molitor: It’s Bigger Than You Think
Source: MDPI journal article supplement (doi:10.3390/genes14122209), 2023-12-14

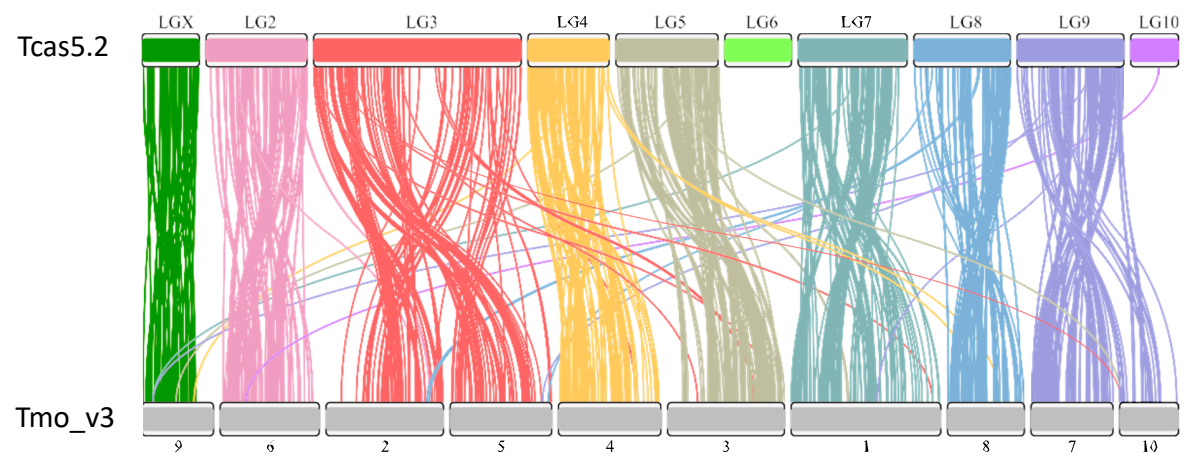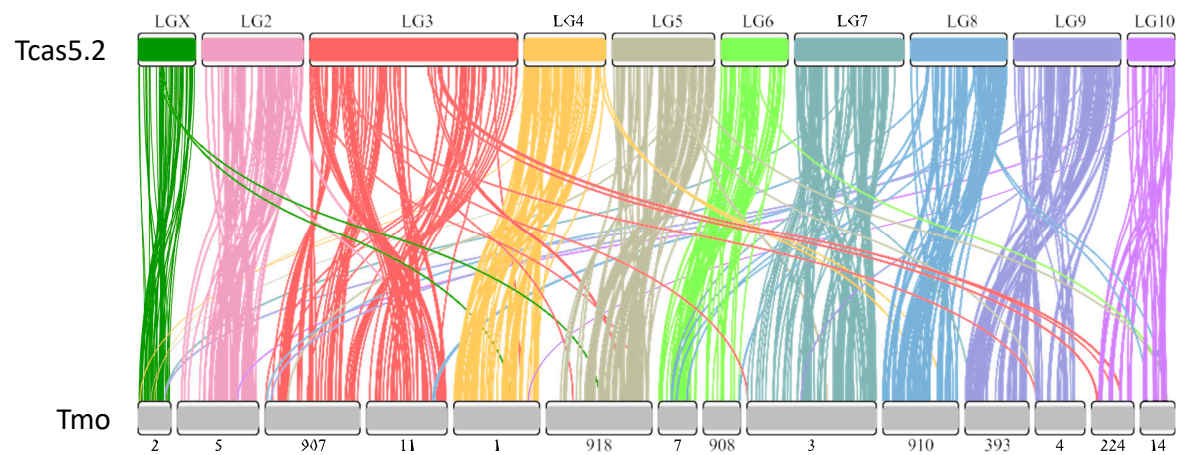

Supplement: s1 [file s1]
